# Supplementary material for: Dynamic Patterns of Threat-Associated Gene Expression in the Amygdala and Blood
Source: Front Psychiatry. 2019 Jan 17;9:778. doi: 10.3389/fpsyt.2018.00778 (PMC6344436; doi:10.3389/fpsyt.2018.00778)
Supplement: Supplementary file 2 [file Table_2.XLSX]

## Sheet: Sheet1
Table S2. Genes differentially expressed in FC compared to HC in amygdala
Gene	Value HC	Value FC	Fold Change	p-value	q-value
Hspa5	127.991	175.014	0.451436	5e-05	0.00257135
Map1b	111.072	87.8359	-0.338607	5e-05	0.00257135
Malat1	107.795	56.2875	-0.937406	5e-05	0.00257135
Vgf	107.86	129.461	0.263358	5e-05	0.00257135
Lars2	95.0756	73.8505	-0.364469	5e-05	0.00257135
Scg2	93.9496	117.875	0.3273	5e-05	0.00257135
Fam107a	84.3887	103.247	0.290979	5e-05	0.00257135
Psd3	70.7738	58.7485	-0.268663	5e-05	0.00257135
Pdia6	67.1841	80.7454	0.26526	5e-05	0.00257135
Trank1	68.3925	54.0412	-0.339779	5e-05	0.00257135
Nrcam	67.4386	55.0436	-0.293001	5e-05	0.00257135
Adcy1	62.4546	51.3021	-0.283791	5e-05	0.00257135
Synpo	57.554	68.7382	0.256195	5e-05	0.00257135
Egr1	55.4331	72.0486	0.378223	5e-05	0.00257135
Scn2a1	53.6097	41.8388	-0.357652	5e-05	0.00257135
Peg3	51.8092	37.9897	-0.4476	5e-05	0.00257135
Myo5a	51.9512	42.1617	-0.301225	5e-05	0.00257135
Frrs1l	51.5974	41.6169	-0.310129	5e-05	0.00257135
Itpr1	48.522	33.2774	-0.544095	5e-05	0.00257135
Tra2a	48.4978	60.7145	0.324124	5e-05	0.00257135
Son	46.7538	34.6224	-0.433378	5e-05	0.00257135
Apc	43.8354	33.286	-0.397183	5e-05	0.00257135
Gabrb2	43.2111	35.6539	-0.277343	5e-05	0.00257135
1700020I14Rik	42.1047	18.17	-1.21242	5e-05	0.00257135
Akap11	42.0776	33.0215	-0.349646	5e-05	0.00257135
Slc24a2	40.5401	29.6628	-0.450694	5e-05	0.00257135
Ppp1r9a	39.4256	29.5991	-0.41358	5e-05	0.00257135
Homer1	36.4933	47.463	0.379173	5e-05	0.00257135
Egr3	35.4247	44.4326	0.326863	5e-05	0.00257135
Dnajb4	36.5446	44.226	0.275236	5e-05	0.00257135
Galnt9	35.4609	46.2403	0.382923	5e-05	0.00257135
Xbp1	35.7663	45.5107	0.347605	5e-05	0.00257135
Nbea	35.7406	28.0572	-0.349194	5e-05	0.00257135
Uhmk1	34.739	20.7667	-0.742282	5e-05	0.00257135
Chordc1	34.1066	43.0953	0.337479	5e-05	0.00257135
Cacna1e	34.7312	22.7016	-0.613439	5e-05	0.00257135
Huwe1	34.4013	28.259	-0.28375	5e-05	0.00257135
Unc80	34.3971	25.3101	-0.442575	5e-05	0.00257135
Ubr3	34.613	28.4648	-0.282133	5e-05	0.00257135
Tnik	34.1803	24.7244	-0.467233	5e-05	0.00257135
Nptx2	32.8624	40.9476	0.317344	5e-05	0.00257135
Dnajb1	32.6601	41.5987	0.34901	5e-05	0.00257135
Mycbp2	32.3206	24.1427	-0.420862	5e-05	0.00257135
Sphkap	32.0737	24.6564	-0.379432	5e-05	0.00257135
Dmxl2	31.8616	23.8291	-0.419097	5e-05	0.00257135
Ctgf	30.1092	23.2189	-0.374905	5e-05	0.00257135
BC018507	30.2476	24.7361	-0.290203	5e-05	0.00257135
Prrc2c	29.9428	20.8265	-0.523788	5e-05	0.00257135
Zfp106	29.6429	24.2401	-0.290291	5e-05	0.00257135
Sorl1	28.9127	22.426	-0.366533	5e-05	0.00257135
Ptprd	28.6356	21.3347	-0.424603	5e-05	0.00257135
Dst	27.7985	22.1349	-0.328685	5e-05	0.00257135
Bhlhe40	28.0533	35.1198	0.324116	5e-05	0.00257135
Akap6	28.0785	22.1303	-0.343445	5e-05	0.00257135
Kcng1	26.4687	34.8685	0.397642	5e-05	0.00257135
Megf9	26.207	20.5905	-0.347971	5e-05	0.00257135
Atp11b	26.8414	21.9012	-0.293453	5e-05	0.00257135
Herc2	26.9276	20.2215	-0.413198	5e-05	0.00257135
Aff4	26.5462	22.2777	-0.252904	5e-05	0.00257135
Macf1	26.1088	20.5381	-0.346236	5e-05	0.00257135
Sesn3	24.19	12.2867	-0.977311	5e-05	0.00257135
Hook1	24.8534	19.8448	-0.324682	5e-05	0.00257135
Cyp26b1	24.9556	33.8424	0.439469	5e-05	0.00257135
Cpeb4	23.4008	15.8943	-0.55805	5e-05	0.00257135
Ncam2	23.7387	14.8326	-0.678466	5e-05	0.00257135
Atrx	23.7913	18.7669	-0.342243	5e-05	0.00257135
Arc	23.1303	18.5336	-0.319641	5e-05	0.00257135
Pclo	23.0197	17.3209	-0.410357	5e-05	0.00257135
Camk4	22.3564	18.3726	-0.283128	5e-05	0.00257135
Camk1g	21.5039	27.2037	0.339207	5e-05	0.00257135
Ubr5	21.7488	17.6538	-0.30096	5e-05	0.00257135
Doc2b	21.6021	26.6674	0.303905	5e-05	0.00257135
Zkscan16	20.9088	11.6594	-0.842609	5e-05	0.00257135
Tanc2	21.4357	17.3245	-0.307205	5e-05	0.00257135
Sstr2	20.4789	28.0179	0.452211	5e-05	0.00257135
Kcnk9	19.8087	10.6931	-0.889456	5e-05	0.00257135
Nvl	20.8725	16.7373	-0.318532	5e-05	0.00257135
Tsc22d3	20.6993	28.1252	0.442279	5e-05	0.00257135
Kcna2	20.572	16.3854	-0.328268	5e-05	0.00257135
Tnr	20.1445	6.20412	-1.69909	5e-05	0.00257135
Shc3	18.8326	12.5436	-0.586287	5e-05	0.00257135
Tac2	17.9727	29.1919	0.699762	5e-05	0.00257135
Herc1	19.8502	15.2638	-0.37904	5e-05	0.00257135
Golga4	19.7731	16.4193	-0.268146	5e-05	0.00257135
Ryr2	19.3355	14.3934	-0.425846	5e-05	0.00257135
Kcnma1	18.3431	7.90338	-1.21469	5e-05	0.00257135
Pdia4	17.7909	23.8986	0.42579	5e-05	0.00257135
Gpr26	17.4957	7.31619	-1.25784	5e-05	0.00257135
Tmem178b	17.5931	6.15584	-1.51498	5e-05	0.00257135
Arhgap5	18.0711	14.5932	-0.308391	5e-05	0.00257135
Hectd1	18.1572	14.7264	-0.30214	5e-05	0.00257135
Dlgap2	17.8671	14.6649	-0.284941	5e-05	0.00257135
Mecp2	17.7041	14.5041	-0.287616	5e-05	0.00257135
Lphn3	17.2173	14.119	-0.286223	5e-05	0.00257135
Ash1l	17.1652	13.4349	-0.353503	5e-05	0.00257135
Zfp46	16.6762	12.8437	-0.376729	5e-05	0.00257135
2610203C20Rik	16.2807	20.6973	0.346285	5e-05	0.00257135
Golgb1	16.4167	12.7632	-0.363175	5e-05	0.00257135
Slc8a1	16.5163	13.3903	-0.302698	5e-05	0.00257135
Kmt2a	15.9838	12.7567	-0.325347	5e-05	0.00257135
Usp34	14.7884	10.2921	-0.522931	5e-05	0.00257135
Mib1	15.1766	6.72752	-1.1737	5e-05	0.00257135
Cdkl5	14.5766	3.34561	-2.12332	5e-05	0.00257135
Ube3a	14.13	8.03825	-0.81381	5e-05	0.00257135
Usp9x	15.0839	10.6694	-0.499536	5e-05	0.00257135
Kcnq3	14.0965	4.22833	-1.73718	5e-05	0.00257135
Flnb	14.6484	10.2559	-0.514285	5e-05	0.00257135
Smg1	14.5244	11.7859	-0.301423	5e-05	0.00257135
Strn	14.1893	10.9655	-0.371829	5e-05	0.00257135
Ankrd28	14.0351	10.9639	-0.356286	5e-05	0.00257135
Fam214a	13.9756	11.3047	-0.30599	5e-05	0.00257135
Tnks	13.8477	8.78289	-0.656881	5e-05	0.00257135
Fgfr1	13.5586	16.384	0.273085	5e-05	0.00257135
Dusp1	12.5531	8.63547	-0.539695	5e-05	0.00257135
Rps6ka3	12.6845	9.68317	-0.38952	5e-05	0.00257135
Pdyn	13.3296	20.2662	0.604443	5e-05	0.00257135
Lmbrd2	12.8443	6.82639	-0.911933	5e-05	0.00257135
Myo9a	13.2403	10.8454	-0.287851	5e-05	0.00257135
C030023E24Rik	11.8285	16.4994	0.480149	5e-05	0.00257135
Gjb6	12.2302	16.7114	0.450382	5e-05	0.00257135
Slc4a8	12.516	10.2775	-0.284284	5e-05	0.00257135
3110047P20Rik	12.3869	8.75374	-0.50084	5e-05	0.00257135
Mdm4	11.8215	7.09675	-0.736188	5e-05	0.00257135
Usp24	12.2236	9.33903	-0.38833	5e-05	0.00257135
Gabrb1	11.2532	7.38827	-0.607024	5e-05	0.00257135
Nfat5	12.1657	10.0153	-0.28062	5e-05	0.00257135
Dnajc13	12.0868	9.82664	-0.298667	5e-05	0.00257135
Ptprt	11.8177	3.15332	-1.906	5e-05	0.00257135
Bptf	12.0321	10.1113	-0.250914	5e-05	0.00257135
Anapc1	11.9279	9.35354	-0.350752	5e-05	0.00257135
Frmpd4	11.9262	9.61365	-0.310973	5e-05	0.00257135
Ttbk2	11.8988	9.35799	-0.346547	5e-05	0.00257135
P4ha1	11.3447	14.2897	0.33296	5e-05	0.00257135
Rfx3	11.5849	9.25826	-0.323434	5e-05	0.00257135
Dnajb14	10.5419	3.86287	-1.4484	5e-05	0.00257135
Dok6	10.212	3.13629	-1.70314	5e-05	0.00257135
Irs2	11.1208	13.956	0.327622	5e-05	0.00257135
AI414108	11.0727	17.1262	0.629202	5e-05	0.00257135
Nts	10.0461	15.0533	0.583446	5e-05	0.00257135
Chd6	11.2518	8.76837	-0.359781	5e-05	0.00257135
Hmbox1	10.6973	7.0152	-0.608691	5e-05	0.00257135
Unc13c	11.0185	8.63727	-0.351283	5e-05	0.00257135
Ago2	10.9812	8.07524	-0.443454	5e-05	0.00257135
Rasal2	10.8678	8.20667	-0.405194	5e-05	0.00257135
Zmym1	10.4152	13.5837	0.383189	5e-05	0.00257135
Mfsd2a	9.9507	12.67	0.348549	5e-05	0.00257135
Filip1	10.5603	8.41273	-0.328001	5e-05	0.00257135
Jmjd1c	10.6401	8.47935	-0.327486	5e-05	0.00257135
Sestd1	10.6465	8.54792	-0.31673	5e-05	0.00257135
Esyt2	10.5056	8.59614	-0.289393	5e-05	0.00257135
Trpm3	9.99046	6.06272	-0.720586	5e-05	0.00257135
Klhl11	9.84011	5.60626	-0.811637	5e-05	0.00257135
Cdr1	9.89544	5.4679	-0.855777	5e-05	0.00257135
Dennd4a	10.3067	8.34593	-0.304441	5e-05	0.00257135
4932438A13Rik	10.3381	8.57263	-0.270164	5e-05	0.00257135
Tenm3	10.2625	7.90659	-0.376258	5e-05	0.00257135
Ubr1	10.218	8.28381	-0.302752	5e-05	0.00257135
Vps13d	10.1106	7.63147	-0.405837	5e-05	0.00257135
Ankhd1	10.1294	7.68973	-0.397541	5e-05	0.00257135
Birc6	10.1266	7.97014	-0.345472	5e-05	0.00257135
Sdf2l1	9.00497	13.4446	0.578234	5e-05	0.00257135
Akap9	9.93922	7.82017	-0.345933	5e-05	0.00257135
Pygo1	8.90402	6.45854	-0.463248	5e-05	0.00257135
Nav3	9.77175	6.28737	-0.636161	5e-05	0.00257135
Cxadr	9.00884	6.82146	-0.401261	5e-05	0.00257135
Peg10	9.38141	14.765	0.654305	5e-05	0.00257135
Phka2	9.30498	6.69956	-0.473936	5e-05	0.00257135
Unc5d	9.39477	7.14646	-0.39463	5e-05	0.00257135
Atp8a2	8.92261	4.20388	-1.08575	5e-05	0.00257135
Per2	9.03184	12.7223	0.494266	5e-05	0.00257135
Samd12	8.52372	4.07355	-1.0652	5e-05	0.00257135
Hook3	8.92653	7.39506	-0.271536	5e-05	0.00257135
Bod1l	8.83404	6.82761	-0.371693	5e-05	0.00257135
Ankrd12	8.83541	7.26805	-0.281728	5e-05	0.00257135
Kat6a	8.79851	7.22197	-0.284868	5e-05	0.00257135
Cntnap5a	8.50001	3.69303	-1.20266	5e-05	0.00257135
Scn3a	8.65703	6.73012	-0.36324	5e-05	0.00257135
Csmd1	8.63594	5.95343	-0.536632	5e-05	0.00257135
A630007B06Rik	8.20239	5.652	-0.537284	5e-05	0.00257135
Dock7	8.45167	6.97887	-0.276243	5e-05	0.00257135
Setx	8.49877	6.83357	-0.314614	5e-05	0.00257135
Slitrk4	8.20553	6.37113	-0.365046	5e-05	0.00257135
Zzef1	8.47372	6.59957	-0.360623	5e-05	0.00257135
Epg5	8.32732	6.35879	-0.3891	5e-05	0.00257135
Dio2	8.16243	10.9198	0.419879	5e-05	0.00257135
Rictor	8.278	6.62515	-0.321328	5e-05	0.00257135
2410089E03Rik	8.25736	6.69273	-0.303085	5e-05	0.00257135
Dicer1	8.20004	6.4307	-0.350655	5e-05	0.00257135
Amer2	7.68296	4.47903	-0.778476	5e-05	0.00257135
Phc3	7.96916	6.1668	-0.369907	5e-05	0.00257135
Tnpo1	7.80788	5.17058	-0.594604	5e-05	0.00257135
Grin2b	7.64984	0.989322	-2.95092	5e-05	0.00257135
Kctd16	6.65129	4.46109	-0.576238	5e-05	0.00257135
Alkbh8	7.04887	4.6787	-0.591285	5e-05	0.00257135
Hipk2	7.3282	4.40248	-0.735143	5e-05	0.00257135
D10Bwg1379e	7.39876	2.81712	-1.39306	5e-05	0.00257135
Reln	7.46743	5.22056	-0.516406	5e-05	0.00257135
Shkbp1	6.9248	9.05221	0.386498	5e-05	0.00257135
Prkcd	7.01897	9.52312	0.440175	5e-05	0.00257135
Cdkn1a	6.89364	9.89518	0.521461	5e-05	0.00257135
Btg2	6.94309	4.59952	-0.594093	5e-05	0.00257135
Zkscan2	7.20976	4.09693	-0.815409	5e-05	0.00257135
Slc9a7	6.877	2.75057	-1.32205	5e-05	0.00257135
Pdpr	6.79731	4.50839	-0.592354	5e-05	0.00257135
Gm608	7.26965	5.25203	-0.469011	5e-05	0.00257135
Fosl2	7.05406	9.35487	0.407263	5e-05	0.00257135
Cbl	6.96527	1.91065	-1.86611	5e-05	0.00257135
Akap10	6.89494	5.22928	-0.398926	5e-05	0.00257135
Dcx	7.11503	4.99107	-0.511521	5e-05	0.00257135
Kmt2c	7.0735	5.224	-0.437269	5e-05	0.00257135
Lingo2	6.82031	5.40072	-0.336684	5e-05	0.00257135
Rsf1	6.92289	5.77176	-0.262363	5e-05	0.00257135
Prss23	6.55591	8.9092	0.442499	5e-05	0.00257135
Dgki	6.63938	2.4368	-1.44606	5e-05	0.00257135
Zfp81	6.2858	4.58292	-0.455829	5e-05	0.00257135
Chd9	6.76874	5.31995	-0.347473	5e-05	0.00257135
Abca8b	6.61897	4.8171	-0.458443	5e-05	0.00257135
Vps13c	6.59871	3.67674	-0.843757	5e-05	0.00257135
Lactb2	5.93102	4.37661	-0.438466	5e-05	0.00257135
Zfp704	6.5763	5.06317	-0.377236	5e-05	0.00257135
Syt10	5.95423	3.30344	-0.849946	5e-05	0.00257135
Lrp6	6.43073	5.18384	-0.310961	5e-05	0.00257135
Igfn1	6.20493	4.103	-0.596735	5e-05	0.00257135
Vps13b	6.23705	4.77096	-0.386583	5e-05	0.00257135
Plcxd3	5.58291	2.79846	-0.996383	5e-05	0.00257135
Xkr4	5.88156	1.45194	-2.01821	5e-05	0.00257135
Amigo2	5.58966	8.26098	0.563551	5e-05	0.00257135
Ryr3	6.12303	4.66855	-0.39127	5e-05	0.00257135
Pfkfb3	5.93429	7.63527	0.363604	5e-05	0.00257135
Banp	5.88392	7.66783	0.382042	5e-05	0.00257135
Uggt2	5.92254	4.5667	-0.375065	5e-05	0.00257135
Itgb8	5.67768	3.50868	-0.69437	5e-05	0.00257135
Ptpn4	5.77259	1.60031	-1.85086	5e-05	0.00257135
Unc5c	5.95909	4.70235	-0.341709	5e-05	0.00257135
St6gal2	5.40365	3.88275	-0.476858	5e-05	0.00257135
Dpy19l4	5.47791	3.70816	-0.562922	5e-05	0.00257135
Fibcd1	5.41933	2.87528	-0.914415	5e-05	0.00257135
Kcna3	5.06579	2.88908	-0.810175	5e-05	0.00257135
Lrrcc1	5.45204	4.09171	-0.414092	5e-05	0.00257135
Lyst	5.63603	4.25212	-0.406496	5e-05	0.00257135
Lnpep	5.37521	0.730766	-2.87884	5e-05	0.00257135
Cc2d2a	5.43278	3.9521	-0.459071	5e-05	0.00257135
Mga	5.41888	4.38012	-0.307026	5e-05	0.00257135
Trpc5	5.20449	3.16145	-0.719172	5e-05	0.00257135
Klf12	5.257	2.35239	-1.16011	5e-05	0.00257135
Kdm5a	5.3082	4.15608	-0.352999	5e-05	0.00257135
Ubn2	5.23821	4.20331	-0.317548	5e-05	0.00257135
Kcnn3	5.11425	3.95158	-0.372095	5e-05	0.00257135
Mdn1	5.15213	3.97452	-0.374391	5e-05	0.00257135
Thsd7a	5.09731	3.91429	-0.380986	5e-05	0.00257135
Zbtb16	4.94855	7.04667	0.509934	5e-05	0.00257135
Fgd4	4.77714	2.79898	-0.771249	5e-05	0.00257135
Mmp16	4.89119	2.6271	-0.896712	5e-05	0.00257135
Mars2	4.68713	3.17264	-0.563021	5e-05	0.00257135
Gpr68	4.79819	6.44201	0.425022	5e-05	0.00257135
Baz2b	4.9797	3.86589	-0.365259	5e-05	0.00257135
Helz	4.88545	2.19542	-1.15399	5e-05	0.00257135
Wnk3	4.95861	3.96148	-0.323895	5e-05	0.00257135
Cep350	4.95715	3.82022	-0.375855	5e-05	0.00257135
Asxl2	4.84598	3.89551	-0.314975	5e-05	0.00257135
Slc16a7	4.37502	2.17691	-1.00701	5e-05	0.00257135
Ndst4	4.55956	3.25159	-0.48775	5e-05	0.00257135
Zfp398	4.52148	3.31472	-0.447906	5e-05	0.00257135
Nrip1	4.60862	3.28598	-0.488014	5e-05	0.00257135
Col19a1	4.71899	3.70767	-0.347965	5e-05	0.00257135
Rxfp1	4.25418	2.69813	-0.656921	5e-05	0.00257135
Bdp1	4.62477	3.42752	-0.432218	5e-05	0.00257135
Igsf9b	4.36476	2.90744	-0.58615	5e-05	0.00257135
Zfp369	4.19549	0.988658	-2.0853	5e-05	0.00257135
Fosb	4.18477	6.79018	0.698299	5e-05	0.00257135
Tenm1	4.37049	1.51241	-1.53094	5e-05	0.00257135
Fam135b	4.22318	1.1954	-1.82083	5e-05	0.00257135
Zc3h12b	3.97378	2.22686	-0.835503	5e-05	0.00257135
Btbd7	3.98527	2.6621	-0.582112	5e-05	0.00257135
Erbb4	3.93609	0.603194	-2.70607	5e-05	0.00257135
Cntnap5b	3.9929	1.65792	-1.26807	5e-05	0.00257135
Csmd3	4.15845	3.25498	-0.353396	5e-05	0.00257135
Trip11	4.03364	2.28253	-0.82145	5e-05	0.00257135
Abca1	4.06324	2.88455	-0.494284	5e-05	0.00257135
Map3k2	4.02854	3.23992	-0.3143	5e-05	0.00257135
Lrp1b	4.06948	2.91035	-0.483648	5e-05	0.00257135
Adamts3	3.97194	3.05945	-0.376572	5e-05	0.00257135
Utp20	3.97373	3.02053	-0.395695	5e-05	0.00257135
Aff2	3.77314	2.17236	-0.796504	5e-05	0.00257135
Cdhr1	3.75212	2.79249	-0.426152	5e-05	0.00257135
Gabpb2	3.87827	3.02275	-0.35955	5e-05	0.00257135
Cntnap5c	3.67077	1.26397	-1.53813	5e-05	0.00257135
5330426P16Rik	3.39998	1.95796	-0.796175	5e-05	0.00257135
Etnppl	3.53552	5.93865	0.748213	5e-05	0.00257135
Rora	3.22981	0.807032	-2.00075	5e-05	0.00257135
Tmem245	3.63469	1.39262	-1.38403	5e-05	0.00257135
Tcp11l1	3.47584	2.07596	-0.743581	5e-05	0.00257135
Chd1	3.66326	2.9232	-0.325579	5e-05	0.00257135
Ankfn1	3.27803	1.82757	-0.842906	5e-05	0.00257135
Zkscan8	3.58785	2.82484	-0.344954	5e-05	0.00257135
Fras1	3.64874	2.42201	-0.591196	5e-05	0.00257135
Prkdc	3.55313	2.86483	-0.310638	5e-05	0.00257135
Xrn1	3.36355	1.16827	-1.52562	5e-05	0.00257135
Ptprc	3.26139	4.22319	0.372846	5e-05	0.00257135
Ptprb	3.34356	2.29183	-0.544887	5e-05	0.00257135
Dgkh	3.0646	0.767483	-1.99749	5e-05	0.00257135
Gpr101	3.10128	4.35933	0.491244	5e-05	0.00257135
Spata13	3.16727	4.02494	0.345729	5e-05	0.00257135
Itga4	3.15547	1.98617	-0.667864	5e-05	0.00257135
Atm	3.04024	2.34414	-0.37513	5e-05	0.00257135
Nyap2	2.88842	2.00127	-0.529362	5e-05	0.00257135
Grin2a	2.78873	0.758026	-1.87929	5e-05	0.00257135
Nhlrc2	2.69443	1.75109	-0.621726	5e-05	0.00257135
Magel2	2.70703	3.64536	0.429351	5e-05	0.00257135
Trps1	2.77504	2.01576	-0.461186	5e-05	0.00257135
Uvssa	2.67113	1.85267	-0.527842	5e-05	0.00257135
Gabrg3	2.27321	1.09579	-1.05276	5e-05	0.00257135
Ar	2.34825	1.10332	-1.08974	5e-05	0.00257135
Pcsk9	2.34083	1.58347	-0.563937	5e-05	0.00257135
Pou2f1	2.47188	1.78563	-0.469177	5e-05	0.00257135
Adra1a	2.21302	1.08754	-1.02496	5e-05	0.00257135
Il1rapl1	2.08918	1.04649	-0.997378	5e-05	0.00257135
Col12a1	2.31189	1.73235	-0.416344	5e-05	0.00257135
Fbxo32	2.24365	1.64553	-0.447293	5e-05	0.00257135
Pla2g4e	2.11633	1.22085	-0.793673	5e-05	0.00257135
Ninl	2.13072	1.39782	-0.608169	5e-05	0.00257135
Sntb2	2.05461	1.306	-0.65371	5e-05	0.00257135
Cdh6	1.96722	1.05503	-0.898875	5e-05	0.00257135
Pomc	1.65218	4.24719	1.36214	5e-05	0.00257135
Xpo4	1.9596	0.966324	-1.01998	5e-05	0.00257135
BC005561	1.93207	0.510251	-1.92087	5e-05	0.00257135
Arhgap36	1.81106	2.90854	0.683457	5e-05	0.00257135
Serinc2	1.6879	2.65936	0.655846	5e-05	0.00257135
Kcnh7	1.79834	0.465384	-1.95017	5e-05	0.00257135
Fat4	1.98652	1.37213	-0.533824	5e-05	0.00257135
Cdk5rap2	1.75766	1.16814	-0.589451	5e-05	0.00257135
1700001L05Rik	1.74501	1.23088	-0.503544	5e-05	0.00257135
Ptar1	1.51636	0.330823	-2.19648	5e-05	0.00257135
Kcnh5	1.61436	0.968164	-0.737638	5e-05	0.00257135
Dennd4c	1.70045	1.16438	-0.546357	5e-05	0.00257135
Asxl3	1.65961	1.22606	-0.436809	5e-05	0.00257135
Exph5	1.63587	1.13386	-0.52881	5e-05	0.00257135
Ago3	1.57739	0.839711	-0.909576	5e-05	0.00257135
Amer1	1.57839	1.11512	-0.501254	5e-05	0.00257135
Sgcd	1.26884	0.475295	-1.41661	5e-05	0.00257135
Plekhg4	1.42658	2.1269	0.576188	5e-05	0.00257135
Adamts6	1.36003	0.860684	-0.660081	5e-05	0.00257135
Slc26a2	1.30649	0.816785	-0.677669	5e-05	0.00257135
Gprin3	1.27003	0.489691	-1.37492	5e-05	0.00257135
Fmn1	1.4007	0.965465	-0.536855	5e-05	0.00257135
BC021891	1.33572	0.912422	-0.549842	5e-05	0.00257135
Kcng3	1.23799	0.161335	-2.93987	5e-05	0.00257135
Clcn5	1.19682	0.661499	-0.855392	5e-05	0.00257135
Xdh	1.17012	1.71033	0.547625	5e-05	0.00257135
D130040H23Rik	1.00836	0.455238	-1.14732	5e-05	0.00257135
Pde11a	1.03925	0.573538	-0.857585	5e-05	0.00257135
Sytl5	0.973973	0.425282	-1.19546	5e-05	0.00257135
Brwd3	1.07285	0.500309	-1.10055	5e-05	0.00257135
Fbn1	1.09713	0.64578	-0.764622	5e-05	0.00257135
Nek10	0.952415	0.427814	-1.15461	5e-05	0.00257135
Nbeal1	0.97286	0.634971	-0.615541	5e-05	0.00257135
Hdx	0.666523	0.268072	-1.31403	5e-05	0.00257135
Wisp1	0.638657	0.369616	-0.789013	5e-05	0.00257135
Lcor	0.605209	0.0978542	-2.62873	5e-05	0.00257135
Polq	0.62878	0.384575	-0.70929	5e-05	0.00257135
Dgkk	0.529515	0.886971	0.744216	5e-05	0.00257135
Mobp	46.2443	57.0518	0.302998	0.0001	0.00468826
Rims1_XLOC_000685	42.1445	35.0163	-0.267316	0.0001	0.00468826
Cnksr2	42.2859	35.0415	-0.271111	0.0001	0.00468826
Ttll7	34.2319	28.793	-0.249626	0.0001	0.00468826
Ddit4	23.4622	18.8641	-0.314696	0.0001	0.00468826
Pcdh7	21.3697	17.6516	-0.275772	0.0001	0.00468826
Rxrg	16.4089	20.3665	0.311722	0.0001	0.00468826
Fgf14	15.334	12.4325	-0.302612	0.0001	0.00468826
Baiap3	15.0501	19.1917	0.350709	0.0001	0.00468826
Mkln1	14.9337	12.1617	-0.29623	0.0001	0.00468826
Scn1a	14.1802	11.7242	-0.274384	0.0001	0.00468826
Ak4	13.59	16.3676	0.268307	0.0001	0.00468826
Lyrm9	13.2662	10.9328	-0.279098	0.0001	0.00468826
Zbed6	6.7435	0.564759	-3.57779	0.0001	0.00468826
Pds5a	10.2607	8.39512	-0.289511	0.0001	0.00468826
Ldlrad4	9.92265	7.90249	-0.328419	0.0001	0.00468826
Zfp280c	8.57807	6.92116	-0.309639	0.0001	0.00468826
Rapgef6	8.65229	7.10701	-0.28384	0.0001	0.00468826
Nin	8.44222	6.86654	-0.298039	0.0001	0.00468826
Pbrm1	8.27165	6.88842	-0.264002	0.0001	0.00468826
Map2k6	7.33301	5.49329	-0.416733	0.0001	0.00468826
Kdm6a	7.67175	6.24192	-0.297565	0.0001	0.00468826
Scai	7.61864	6.37007	-0.258225	0.0001	0.00468826
Rerg	6.17058	8.02324	0.378779	0.0001	0.00468826
Sla	6.09523	4.58359	-0.411202	0.0001	0.00468826
Mob1b	5.92383	4.38857	-0.432779	0.0001	0.00468826
Nipbl	6.19402	5.05227	-0.293942	0.0001	0.00468826
Rspo3	5.71251	4.20722	-0.441257	0.0001	0.00468826
Zfp933	5.48538	7.1123	0.374725	0.0001	0.00468826
Rev3l	5.08578	4.17629	-0.284246	0.0001	0.00468826
Lrba	4.48574	3.64362	-0.299972	0.0001	0.00468826
Pcdh15	3.66729	2.89543	-0.340941	0.0001	0.00468826
Ttll4	2.79539	2.04934	-0.447889	0.0001	0.00468826
Lonrf3	2.75427	3.53121	0.358496	0.0001	0.00468826
Atr	2.39671	1.83307	-0.3868	0.0001	0.00468826
Gm16386	1.73311	1.13005	-0.61697	0.0001	0.00468826
Alms1	1.08555	0.784819	-0.468	0.0001	0.00468826
Slco5a1	0.627431	0.400937	-0.646083	0.0001	0.00468826
Spred2	23.69	28.9251	0.288047	0.00015	0.00671683
Manf	19.9939	24.7546	0.308136	0.00015	0.00671683
Lrrc8b	16.5913	13.5623	-0.290823	0.00015	0.00671683
AW551984	5.25089	6.61108	0.332324	0.00015	0.00671683
5830418K08Rik	4.09249	2.81353	-0.540597	0.00015	0.00671683
Hspb1	3.89578	6.12385	0.652525	0.00015	0.00671683
Cys1	2.94585	4.36654	0.567808	0.00015	0.00671683
Cdon	2.83083	2.19684	-0.365799	0.00015	0.00671683
Zc3h12c	2.40371	1.77595	-0.436674	0.00015	0.00671683
4922501C03Rik	2.34738	1.74529	-0.427588	0.00015	0.00671683
Zbtb40	2.11916	2.73049	0.36567	0.00015	0.00671683
Tdrd5	1.06285	0.653921	-0.700754	0.00015	0.00671683
Nhs	1.14069	0.788136	-0.533395	0.00015	0.00671683
Tacr3	1.01449	1.50248	0.56659	0.00015	0.00671683
Gal	0.414748	1.82817	2.14009	0.00015	0.00671683
Dnajb5	51.1398	61.0103	0.254606	0.0002	0.00857117
Ano3	27.1157	22.9431	-0.241069	0.0002	0.00857117
Dock4	22.358	18.8619	-0.24531	0.0002	0.00857117
Dcn	16.9467	13.28	-0.351752	0.0002	0.00857117
Gfod1	17.6296	20.9982	0.252269	0.0002	0.00857117
Zfp871	13.8161	11.6957	-0.240373	0.0002	0.00857117
Zfc3h1	13.1103	10.8243	-0.276431	0.0002	0.00857117
Arap2	10.9569	9.13518	-0.262333	0.0002	0.00857117
Cers6	10.0454	8.19259	-0.29415	0.0002	0.00857117
Ecel1	8.3115	10.4436	0.329439	0.0002	0.00857117
Pcsk5	5.23814	4.18993	-0.322127	0.0002	0.00857117
H2-T24	3.62667	1.35813	-1.41703	0.0002	0.00857117
Ralgapa2	4.49069	3.71682	-0.272869	0.0002	0.00857117
Hspa1b	3.95966	5.24794	0.406373	0.0002	0.00857117
Gan	3.0698	2.11219	-0.539404	0.0002	0.00857117
Usp43	0.564378	0.323711	-0.801957	0.0002	0.00857117
Caln1	44.4993	36.8822	-0.27086	0.00025	0.0104678
Zyg11b	28.7284	24.1777	-0.248802	0.00025	0.0104678
Itsn2	12.0297	9.7462	-0.303689	0.00025	0.0104678
Klhl29	9.8128	11.8101	0.26728	0.00025	0.0104678
Fam135a	6.12429	4.98694	-0.296386	0.00025	0.0104678
Dok3	5.2141	7.20087	0.465754	0.00025	0.0104678
Fat1	5.91061	4.95412	-0.254677	0.00025	0.0104678
Nxpe4	5.21131	3.97836	-0.389472	0.00025	0.0104678
Chrdl1	2.96336	2.19647	-0.432044	0.00025	0.0104678
Fancm	1.83571	1.36251	-0.43007	0.00025	0.0104678
Clock	11.2329	9.06909	-0.308704	0.0003	0.0122553
Fryl	7.6204	6.34269	-0.264773	0.0003	0.0122553
Ncapd3	6.84086	5.60546	-0.287346	0.0003	0.0122553
Rassf3	6.48513	5.10839	-0.344267	0.0003	0.0122553
Tmod2	65.2702	54.9547	-0.24818	0.00035	0.0138262
Chl1	43.463	36.3117	-0.259352	0.00035	0.0138262
Zmynd8	30.5946	36.3271	0.247769	0.00035	0.0138262
Lmo7	26.074	22.1439	-0.235699	0.00035	0.0138262
Ranbp2	15.9373	13.5137	-0.237978	0.00035	0.0138262
Bdnf	10.2701	12.4945	0.282838	0.00035	0.0138262
Jmjd4	9.72163	8.04701	-0.272745	0.00035	0.0138262
Zfp292	5.25444	4.34657	-0.273662	0.00035	0.0138262
Ccdc171	1.44982	1.0275	-0.496739	0.00035	0.0138262
Slc10a4	0.554238	1.04009	0.908125	0.00035	0.0138262
Arhgef12	25.2882	21.454	-0.237215	0.0004	0.0154803
Tenm4	15.7868	13.2566	-0.252006	0.0004	0.0154803
Nr4a3	11.2492	14.1341	0.329365	0.0004	0.0154803
Tulp4	11.1549	9.30691	-0.261299	0.0004	0.0154803
Arl4d	9.04314	6.77396	-0.416823	0.0004	0.0154803
Polr3a	9.27106	7.69173	-0.269426	0.0004	0.0154803
Dusp4	4.31532	5.71682	0.405745	0.0004	0.0154803
Smim3	2.75653	3.90052	0.500813	0.0004	0.0154803
Numb	15.0489	17.9709	0.256013	0.00045	0.0170378
Nsd1	13.112	11.1519	-0.233603	0.00045	0.0170378
Alg10b	12.5771	10.3318	-0.283709	0.00045	0.0170378
Hecw1	8.462	7.14201	-0.244667	0.00045	0.0170378
Sp4	5.61023	4.52734	-0.309396	0.00045	0.0170378
9230114K14Rik	0.835202	0.438381	-0.929941	0.00045	0.0170378
Lrriq1	0.636226	0.402408	-0.660878	0.00045	0.0170378
Grm5	41.2847	35.259	-0.227615	0.0005	0.018562
Pde4a	29.3976	34.5259	0.231979	0.0005	0.018562
Herpud1	28.1773	33.8691	0.265433	0.0005	0.018562
Etv5	22.8048	27.039	0.2457	0.0005	0.018562
Nav1	19.6495	16.644	-0.239491	0.0005	0.018562
Htt	18.5116	15.6839	-0.239145	0.0005	0.018562
Gpam	13.9717	11.6412	-0.26327	0.0005	0.018562
Sulf1	8.20166	6.73921	-0.283336	0.0005	0.018562
6820431F20Rik	0.838754	0.551666	-0.604453	0.0005	0.018562
Traf3	14.0566	16.5205	0.23301	0.00055	0.0199759
Cbfa2t3	4.65098	5.61826	0.272591	0.00055	0.0199759
Egfr	2.19859	1.66192	-0.40373	0.00055	0.0199759
Adam8	1.76342	2.44095	0.469066	0.00055	0.0199759
Cd46	1.47472	0.765834	-0.945341	0.00055	0.0199759
Tmem239	1.11292	0.510874	-1.12331	0.00055	0.0199759
Itga10	0.89981	1.28117	0.509772	0.00055	0.0199759
Nefm	71.2727	84.5644	0.2467	0.0006	0.0212936
Asic1	26.0214	30.6364	0.23555	0.0006	0.0212936
Mfsd4	19.6382	16.3454	-0.264778	0.0006	0.0212936
Creld2	11.7661	14.8629	0.337085	0.0006	0.0212936
Zfp318	12.1511	10.1534	-0.259133	0.0006	0.0212936
Guf1	10.8606	9.01505	-0.268702	0.0006	0.0212936
Vps13a	6.89554	5.79838	-0.250012	0.0006	0.0212936
Satb2	5.77719	4.67927	-0.304086	0.0006	0.0212936
Sema5a	5.65013	4.74881	-0.250717	0.0006	0.0212936
Ttc37	4.83666	3.94959	-0.292308	0.0006	0.0212936
Lamc2	4.44401	3.55946	-0.320206	0.0006	0.0212936
Arhgap29	4.42337	3.54975	-0.317428	0.0006	0.0212936
Crh	3.47292	4.93553	0.507055	0.0006	0.0212936
Neat1	30.9113	36.5522	0.241822	0.00065	0.0225525
Chka	27.5791	32.7602	0.248367	0.00065	0.0225525
Apod	25.4076	30.3163	0.254832	0.00065	0.0225525
Abhd2	20.6955	17.3558	-0.253903	0.00065	0.0225525
Jdp2	16.8551	20.5985	0.289353	0.00065	0.0225525
Thoc2	8.81112	7.3881	-0.254121	0.00065	0.0225525
Qser1	2.39677	1.92935	-0.312978	0.00065	0.0225525
Chodl	1.01231	1.56031	0.624177	0.00065	0.0225525
Oacyl	0.92875	0.58441	-0.668311	0.00065	0.0225525
Sgsm1	39.3199	46.2534	0.234297	0.0007	0.0239308
Nek1	12.9879	10.7672	-0.270531	0.0007	0.0239308
Col23a1	12.831	10.7832	-0.250851	0.0007	0.0239308
Fkbp5	12.0091	14.2265	0.244453	0.0007	0.0239308
Ksr2	5.11663	4.2092	-0.281647	0.0007	0.0239308
Pnoc	3.79843	5.06321	0.414651	0.0007	0.0239308
Il17rd	1.59681	1.22919	-0.377488	0.0007	0.0239308
Plk1	0.687147	1.14132	0.732014	0.0007	0.0239308
Lhx8	0.346746	0.709404	1.03273	0.0007	0.0239308
Slc2a1	32.0211	37.6441	0.233401	0.00075	0.0253098
Sdc4	15.119	18.1175	0.261023	0.00075	0.0253098
Ccdc6	11.7312	13.8933	0.244031	0.00075	0.0253098
Klhl28	5.51771	4.34446	-0.344893	0.00075	0.0253098
Dcc	4.23086	3.53298	-0.260066	0.00075	0.0253098
Thsd4	2.5032	3.08778	0.302801	0.00075	0.0253098
Atp8b1	0.678401	0.466521	-0.540195	0.00075	0.0253098
Ncor2	21.0621	24.513	0.218898	0.0008	0.0266326
Kdm5d	5.91435	4.86177	-0.282737	0.0008	0.0266326
Bbc3	3.47295	2.47998	-0.485834	0.0008	0.0266326
Cep110	3.09006	2.46299	-0.327224	0.0008	0.0266326
Slc30a7	3.11741	2.54781	-0.29109	0.0008	0.0266326
Heg1	2.7176	2.11462	-0.361939	0.0008	0.0266326
Lama3	0.717588	0.530587	-0.435566	0.0008	0.0266326
Oprd1	5.42079	6.65818	0.296623	0.00085	0.028052
Klf11	2.60048	1.95782	-0.409534	0.00085	0.028052
Cdh12	1.14523	0.825847	-0.471692	0.00085	0.028052
Hnrnpdl	65.6927	56.5386	-0.216497	0.0009	0.0294931
Nrip2	10.9653	13.4811	0.297998	0.0009	0.0294931
Flrt2	9.47664	8.01854	-0.241036	0.0009	0.0294931
Dync2h1	3.27392	2.73479	-0.259588	0.0009	0.0294931
Igip	52.6892	62.111	0.23734	0.00095	0.0307707
Pcnx	15.5915	13.3821	-0.220456	0.00095	0.0307707
Grm4	4.0717	5.22647	0.360205	0.00095	0.0307707
Mrs2	12.16	9.96097	-0.287784	0.001	0.0319703
Nln	9.83021	8.1859	-0.264082	0.001	0.0319703
Gabrg1	9.101	10.7969	0.246518	0.001	0.0319703
Pvrl3	6.13379	4.8089	-0.351073	0.001	0.0319703
Fam20a	4.06025	5.26017	0.373539	0.001	0.0319703
Tacr1	2.74482	3.42579	0.319723	0.001	0.0319703
Thada	2.05759	1.63519	-0.331502	0.001	0.0319703
Wdr52	1.52477	1.15647	-0.398866	0.001	0.0319703
9330159F19Rik	21.0116	24.5458	0.224286	0.00105	0.0333146
Wnt9a	4.94914	3.93198	-0.331922	0.00105	0.0333146
Adamts2	4.1328	5.05391	0.29028	0.00105	0.0333146
A830082N09Rik	3.6855	3.0335	-0.280879	0.00105	0.0333146
Avp	0.212271	1.35983	2.67945	0.00105	0.0333146
Pex5l	56.7892	48.4694	-0.228543	0.0011	0.0345092
Ttc39b	12.0973	10.3655	-0.22289	0.0011	0.0345092
Eml5	10.3373	8.02317	-0.365612	0.0011	0.0345092
Pikfyve	6.19229	5.27597	-0.231037	0.0011	0.0345092
Isl1	0.384372	0.686213	0.836152	0.0011	0.0345092
Kif1b	116.83	98.099	-0.252096	0.00115	0.0358631
Setd2	10.796	9.24781	-0.223319	0.00115	0.0358631
Ndnf	1.88713	1.41938	-0.410934	0.00115	0.0358631
Plag1	0.903637	0.622577	-0.53749	0.00115	0.0358631
C1ql3	150.459	177.83	0.241132	0.0012	0.0370912
Spns2	25.5254	29.9943	0.232755	0.0012	0.0370912
Abca5	8.56622	7.29484	-0.231782	0.0012	0.0370912
Zhx2	4.15808	5.07667	0.287964	0.0012	0.0370912
Acta2	2.50366	3.3362	0.414165	0.0012	0.0370912
Plat	15.6057	18.5564	0.249844	0.00125	0.0382139
C77370	6.9639	5.93162	-0.23147	0.00125	0.0382139
Slc16a4	1.89177	1.29938	-0.541921	0.00125	0.0382139
Krt20	1.32557	0.808827	-0.712711	0.00125	0.0382139
Slc5a7	0.551927	0.808908	0.551498	0.00125	0.0382139
Mal	52.8486	61.7852	0.225394	0.0013	0.0392557
Myadm	36.6731	42.8404	0.224248	0.0013	0.0392557
Klhl24	12.3964	10.6131	-0.224072	0.0013	0.0392557
Inhba	1.23074	1.95696	0.669091	0.0013	0.0392557
Stip1	93.3373	108.341	0.215057	0.00135	0.040445
Dok5	17.7676	21.2841	0.260528	0.00135	0.040445
Col6a4	1.21003	0.911967	-0.40799	0.00135	0.040445
Bcl6	5.93017	7.22305	0.284533	0.0014	0.0415568
Syt14	2.41051	1.61568	-0.577196	0.0014	0.0415568
Nrg1	2.13215	1.49285	-0.514238	0.0014	0.0415568
Csrnp3	8.67003	7.42858	-0.22295	0.00145	0.0427684
Homer2	7.96901	6.77213	-0.23479	0.00145	0.0427684
Atrn	36.135	31.0891	-0.216989	0.0015	0.043781
Hopx	28.5263	23.5115	-0.278925	0.0015	0.043781
Cnot1	16.2903	14.0384	-0.214632	0.0015	0.043781
Faxc	15.7018	13.5572	-0.211873	0.0015	0.043781
2900026A02Rik	12.9015	15.0199	0.219331	0.0015	0.043781
Insr	8.30178	7.11089	-0.223392	0.0015	0.043781
Hunk	2.9868	2.36754	-0.335214	0.0015	0.043781
Samd3	2.17469	1.48126	-0.553988	0.0015	0.043781
Tet1	0.856049	0.667923	-0.358011	0.0015	0.043781
Dync1h1	66.582	56.4868	-0.237217	0.00155	0.0450209
Arntl2	3.42995	2.44306	-0.489502	0.00155	0.0450209
Slc18a2	1.27822	1.75243	0.455219	0.00155	0.0450209
Zfp445	42.2206	36.4377	-0.212514	0.0016	0.0462488
Dcp2	11.4754	9.87948	-0.216034	0.0016	0.0462488
Plxnd1	24.2896	20.8831	-0.218003	0.00165	0.047335
Jakmip2	20.8113	17.8669	-0.220073	0.00165	0.047335
Arhgap20	13.1142	11.2483	-0.221424	0.00165	0.047335
Slc7a14	29.6122	25.5221	-0.214449	0.0017	0.0483721
Nr4a1	24.5915	20.857	-0.237623	0.0017	0.0483721
Paqr8	23.595	27.3794	0.214613	0.0017	0.0483721
Fam228b	1.72356	1.21759	-0.501359	0.0017	0.0483721
Otud4	13.7868	11.8235	-0.221629	0.00175	0.049459
Utrn	6.24621	5.37415	-0.216942	0.00175	0.049459
