# Supplementary material for: Dynamic Patterns of Threat-Associated Gene Expression in the Amygdala and Blood
Source: Front Psychiatry. 2019 Jan 17;9:778. doi: 10.3389/fpsyt.2018.00778 (PMC6344436; doi:10.3389/fpsyt.2018.00778)
Supplement: Supplementary file 3 [file Table_3.XLSX]

## Sheet: Sheet1
Table S3: Enrichment analyses for differential expressed genes in amygdala of FC mice compared to HC controls.
Tissue	Term	Count	%	P Value	Benjamini
Amygdala	GO:0007611~learning or memory	12	2.0339	1.62e-07	0.000418
Amygdala	GO:0008306~associative learning	9	1.52542	7.98e-06	0.0102523
Amygdala	GO:0007268~chemical synaptic transmission	18	3.05085	9.46e-06	0.00811621
Amygdala	GO:0003007~heart morphogenesis	11	1.86441	1.29e-05	0.00829125
Amygdala	GO:0035556~intracellular signal transduction	28	4.74576	3.71e-05	0.0189796
Amygdala	GO:0055085~transmembrane transport	26	4.40678	5.4e-05	0.023008
Amygdala	GO:0007507~heart development	21	3.55932	6.77e-05	0.0246963
Amygdala	GO:0048511~rhythmic process	14	2.37288	7.91e-05	0.0252406
Amygdala	GO:0007612~learning	10	1.69492	0.000105	0.0297051
Amygdala	GO:0007157~heterophilic cell-cell adhesion via plasma membrane cell adhesion molecules	9	1.52542	0.000107	0.0271837
Amygdala	GO:0045944~positive regulation of transcription from RNA polymerase II promoter	50	8.47458	0.000158	0.0363761
Amygdala	GO:0006811~ion transport	34	5.76271	0.000171	0.0361759
Amygdala	GO:0006351~transcription, DNA-templated	81	13.7288	0.00021	0.0408488
Amygdala	GO:0045053~protein retention in Golgi apparatus	4	0.677966	0.000224	0.0404881
Amygdala	GO:0007626~locomotory behavior	12	2.0339	0.00027	0.0454601
Amygdala	GO:0001964~startle response	6	1.01695	0.000333	0.0523172
Amygdala	GO:0001822~kidney development	13	2.20339	0.000362	0.0535678
Amygdala	GO:0007155~cell adhesion	29	4.91525	0.000377	0.0527334
Amygdala	GO:0009791~post-embryonic development	12	2.0339	0.000432	0.0570665
Amygdala	GO:0018105~peptidyl-serine phosphorylation	13	2.20339	0.000446	0.0560327
Amygdala	GO:0006974~cellular response to DNA damage stimulus	26	4.40678	0.000492	0.0587047
Amygdala	GO:0007420~brain development	17	2.88136	0.000515	0.0587224
Amygdala	GO:0010738~regulation of protein kinase A signaling	5	0.847458	0.000707	0.0763415
Amygdala	GO:0045773~positive regulation of axon extension	7	1.18644	0.000901	0.0924421
Amygdala	GO:0030182~neuron differentiation	12	2.0339	0.00107125	0.104868
Amygdala	GO:0007623~circadian rhythm	11	1.86441	0.00107374	0.101268
Amygdala	GO:0071805~potassium ion transmembrane transport	10	1.69492	0.00109392	0.0994498
Amygdala	GO:0000122~negative regulation of transcription from RNA polymerase II promoter	37	6.27119	0.0011128	0.0976501
Amygdala	GO:0048167~regulation of synaptic plasticity	7	1.18644	0.00117269	0.0992721
Amygdala	GO:0006355~regulation of transcription, DNA-templated	90	15.2542	0.00133757	0.108889
Amygdala	GO:0007399~nervous system development	23	3.89831	0.00135381	0.10678
Amygdala	GO:0009952~anterior/posterior pattern specification	11	1.86441	0.00141812	0.108272
Amygdala	GO:0007218~neuropeptide signaling pathway	9	1.52542	0.00146821	0.108678
Amygdala	GO:0016569~covalent chromatin modification	18	3.05085	0.00179683	0.127752
Amygdala	GO:0008104~protein localization	9	1.52542	0.00188561	0.13007
Amygdala	GO:0000902~cell morphogenesis	9	1.52542	0.00221222	0.146973
Amygdala	GO:0031175~neuron projection development	12	2.0339	0.00221632	0.143546
Amygdala	GO:0007270~neuron-neuron synaptic transmission	4	0.677966	0.00241331	0.151516
Amygdala	GO:0046777~protein autophosphorylation	14	2.37288	0.00242106	0.148372
Amygdala	GO:0060291~long-term synaptic potentiation	7	1.18644	0.00264129	0.157054
Amygdala	GO:0007616~long-term memory	6	1.01695	0.00264948	0.153972
Amygdala	GO:0006970~response to osmotic stress	5	0.847458	0.00270354	0.153426
Amygdala	GO:0042177~negative regulation of protein catabolic process	6	1.01695	0.00301943	0.166166
Amygdala	GO:0030900~forebrain development	9	1.52542	0.00322439	0.172764
Amygdala	GO:0060079~excitatory postsynaptic potential	6	1.01695	0.00342525	0.178828
Amygdala	GO:0006813~potassium ion transport	11	1.86441	0.00358796	0.182833
Amygdala	GO:0016337~single organismal cell-cell adhesion	10	1.69492	0.00385942	0.191518
Amygdala	GO:0045893~positive regulation of transcription, DNA-templated	29	4.91525	0.00474147	0.225747
Amygdala	GO:0042593~glucose homeostasis	11	1.86441	0.00497779	0.231379
Amygdala	GO:0060122~inner ear receptor stereocilium organization	5	0.847458	0.00522051	0.237004
Amygdala	GO:0048675~axon extension	5	0.847458	0.00603224	0.264025
Amygdala	GO:0048666~neuron development	7	1.18644	0.00616234	0.264473
Amygdala	GO:0043524~negative regulation of neuron apoptotic process	12	2.0339	0.00645938	0.270902
Amygdala	GO:0007156~homophilic cell adhesion via plasma membrane adhesion molecules	12	2.0339	0.00739398	0.298918
Amygdala	GO:0008543~fibroblast growth factor receptor signaling pathway	6	1.01695	0.00742699	0.295478
Amygdala	GO:0009790~embryo development	8	1.35593	0.00745843	0.292093
Amygdala	GO:0035264~multicellular organism growth	10	1.69492	0.00765101	0.294028
Amygdala	GO:0060078~regulation of postsynaptic membrane potential	3	0.508475	0.00773363	0.292407
Amygdala	GO:0032922~circadian regulation of gene expression	7	1.18644	0.0078696	0.292505
Amygdala	GO:0048169~regulation of long-term neuronal synaptic plasticity	5	0.847458	0.00789808	0.289292
Amygdala	GO:0043065~positive regulation of apoptotic process	19	3.22034	0.00825126	0.296001
Amygdala	GO:0030326~embryonic limb morphogenesis	7	1.18644	0.00918176	0.319168
Amygdala	GO:0042493~response to drug	19	3.22034	0.00926299	0.3173
Amygdala	GO:0001764~neuron migration	10	1.69492	0.00940015	0.317045
Amygdala	GO:0007411~axon guidance	11	1.86441	0.0107802	0.350063
Amygdala	GO:0010942~positive regulation of cell death	6	1.01695	0.0117621	0.370755
Amygdala	GO:0051592~response to calcium ion	7	1.18644	0.0131333	0.399427
Amygdala	GO:0032869~cellular response to insulin stimulus	8	1.35593	0.0131353	0.394953
Amygdala	GO:0070588~calcium ion transmembrane transport	8	1.35593	0.0131353	0.394953
Amygdala	GO:0007275~multicellular organism development	43	7.28814	0.0136509	0.402343
Amygdala	GO:0042787~protein ubiquitination involved in ubiquitin-dependent protein catabolic process	10	1.69492	0.0150846	0.429407
Amygdala	GO:0035280~miRNA loading onto RISC involved in gene silencing by miRNA	3	0.508475	0.0156336	0.436433
Amygdala	GO:0060059~embryonic retina morphogenesis in camera-type eye	3	0.508475	0.0156336	0.436433
Amygdala	GO:0034765~regulation of ion transmembrane transport	10	1.69492	0.0157674	0.434691
Amygdala	GO:0003279~cardiac septum development	4	0.677966	0.0160955	0.436942
Amygdala	GO:0042752~regulation of circadian rhythm	6	1.01695	0.0162737	0.436132
Amygdala	GO:0030073~insulin secretion	5	0.847458	0.017268	0.451264
Amygdala	GO:0043401~steroid hormone mediated signaling pathway	6	1.01695	0.0175585	0.452446
Amygdala	GO:0007605~sensory perception of sound	10	1.69492	0.0179521	0.455517
Amygdala	GO:0010976~positive regulation of neuron projection development	10	1.69492	0.0179521	0.455517
Amygdala	GO:0016310~phosphorylation	28	4.74576	0.0181242	0.454432
Amygdala	GO:0002931~response to ischemia	5	0.847458	0.0189984	0.466019
Amygdala	GO:0016358~dendrite development	5	0.847458	0.0189984	0.466019
Amygdala	GO:0016055~Wnt signaling pathway	13	2.20339	0.0201543	0.481924
Amygdala	GO:0006816~calcium ion transport	10	1.69492	0.0203493	0.481006
Amygdala	GO:0071313~cellular response to caffeine	3	0.508475	0.0204529	0.47858
Amygdala	GO:0006623~protein targeting to vacuole	3	0.508475	0.0204529	0.47858
Amygdala	GO:0042596~fear response	3	0.508475	0.0204529	0.47858
Amygdala	GO:0001525~angiogenesis	14	2.37288	0.0207694	0.479733
Amygdala	GO:0060976~coronary vasculature development	5	0.847458	0.0208323	0.476705
Amygdala	GO:0051209~release of sequestered calcium ion into cytosol	5	0.847458	0.0208323	0.476705
Amygdala	GO:0048265~response to pain	4	0.677966	0.0211804	0.478373
Amygdala	GO:0042391~regulation of membrane potential	8	1.35593	0.0213981	0.477911
Amygdala	GO:0034976~response to endoplasmic reticulum stress	7	1.18644	0.0217073	0.47891
Amygdala	GO:0003281~ventricular septum development	5	0.847458	0.0227711	0.491542
Amygdala	GO:0019233~sensory perception of pain	7	1.18644	0.0229928	0.491027
Amygdala	GO:0035924~cellular response to vascular endothelial growth factor stimulus	4	0.677966	0.0240146	0.502371
Amygdala	GO:0007216~G-protein coupled glutamate receptor signaling pathway	3	0.508475	0.0258035	0.523994
Amygdala	GO:0006892~post-Golgi vesicle-mediated transport	3	0.508475	0.0258035	0.523994
Amygdala	GO:0070198~protein localization to chromosome, telomeric region	3	0.508475	0.0258035	0.523994
Amygdala	GO:0045778~positive regulation of ossification	4	0.677966	0.0270434	0.536999
Amygdala	GO:0043410~positive regulation of MAPK cascade	8	1.35593	0.0299164	0.569976
Amygdala	GO:0009880~embryonic pattern specification	4	0.677966	0.030266	0.570375
Amygdala	GO:0071480~cellular response to gamma radiation	4	0.677966	0.030266	0.570375
Amygdala	GO:0001662~behavioral fear response	5	0.847458	0.0315988	0.582454
Amygdala	GO:0035196~production of miRNAs involved in gene silencing by miRNA	3	0.508475	0.0316511	0.57925
Amygdala	GO:0055091~phospholipid homeostasis	3	0.508475	0.0316511	0.57925
Amygdala	GO:0060736~prostate gland growth	3	0.508475	0.0316511	0.57925
Amygdala	GO:0071044~histone mRNA catabolic process	3	0.508475	0.0316511	0.57925
Amygdala	GO:0060119~inner ear receptor cell development	3	0.508475	0.0316511	0.57925
Amygdala	GO:0090399~replicative senescence	3	0.508475	0.0316511	0.57925
Amygdala	GO:0050807~regulation of synapse organization	3	0.508475	0.0316511	0.57925
Amygdala	GO:0010468~regulation of gene expression	16	2.71186	0.0326896	0.58744
Amygdala	GO:0006511~ubiquitin-dependent protein catabolic process	10	1.69492	0.0334357	0.592081
Amygdala	GO:0003382~epithelial cell morphogenesis	4	0.677966	0.0336813	0.59109
Amygdala	GO:0008542~visual learning	6	1.01695	0.0341737	0.592816
Amygdala	GO:0007409~axonogenesis	8	1.35593	0.0341801	0.589247
Amygdala	GO:0014068~positive regulation of phosphatidylinositol 3-kinase signaling	6	1.01695	0.0362314	0.607376
Amygdala	GO:0043066~negative regulation of apoptotic process	25	4.23729	0.0365598	0.607169
Amygdala	GO:0043517~positive regulation of DNA damage response, signal transduction by p53 class mediator	3	0.508475	0.0379628	0.61772
Amygdala	GO:0035413~positive regulation of catenin import into nucleus	3	0.508475	0.0379628	0.61772
Amygdala	GO:0000042~protein targeting to Golgi	3	0.508475	0.0379628	0.61772
Amygdala	GO:0022008~neurogenesis	6	1.01695	0.0383637	0.618139
Amygdala	GO:0007416~synapse assembly	5	0.847458	0.0393665	0.624333
Amygdala	GO:0001934~positive regulation of protein phosphorylation	11	1.86441	0.0395446	0.622574
Amygdala	GO:0010628~positive regulation of gene expression	19	3.22034	0.0396139	0.61981
Amygdala	GO:0006869~lipid transport	8	1.35593	0.0404668	0.624416
Amygdala	GO:0001578~microtubule bundle formation	4	0.677966	0.0410831	0.626734
Amygdala	GO:0007274~neuromuscular synaptic transmission	4	0.677966	0.0410831	0.626734
Amygdala	GO:0035987~endodermal cell differentiation	4	0.677966	0.0410831	0.626734
Amygdala	GO:0051726~regulation of cell cycle	8	1.35593	0.0421484	0.633026
Amygdala	GO:0090263~positive regulation of canonical Wnt signaling pathway	6	1.01695	0.0428542	0.63597
Amygdala	GO:0043154~negative regulation of cysteine-type endopeptidase activity involved in apoptotic process	6	1.01695	0.0428542	0.63597
Amygdala	GO:0006468~protein phosphorylation	25	4.23729	0.0437251	0.640266
Amygdala	GO:0060402~calcium ion transport into cytosol	3	0.508475	0.0447075	0.645385
Amygdala	GO:0048660~regulation of smooth muscle cell proliferation	3	0.508475	0.0447075	0.645385
Amygdala	GO:0060213~positive regulation of nuclear-transcribed mRNA poly(A) tail shortening	3	0.508475	0.0447075	0.645385
Amygdala	GO:0045995~regulation of embryonic development	3	0.508475	0.0447075	0.645385
Amygdala	GO:1904754~positive regulation of vascular associated smooth muscle cell migration	3	0.508475	0.0447075	0.645385
Amygdala	GO:0032455~nerve growth factor processing	3	0.508475	0.0447075	0.645385
Amygdala	GO:0001892~embryonic placenta development	4	0.677966	0.0450653	0.645173
Amygdala	GO:0007205~protein kinase C-activating G-protein coupled receptor signaling pathway	4	0.677966	0.0450653	0.645173
Amygdala	GO:0008344~adult locomotory behavior	6	1.01695	0.0476478	0.662947
Amygdala	GO:0016477~cell migration	11	1.86441	0.04879	0.668698
Amygdala	GO:0051965~positive regulation of synapse assembly	6	1.01695	0.0501589	0.675964
Amygdala	GO:0001666~response to hypoxia	11	1.86441	0.0502196	0.673334
Amygdala	GO:0008285~negative regulation of cell proliferation	18	3.05085	0.0514974	0.679695
Amygdala	GO:0031054~pre-miRNA processing	3	0.508475	0.0518553	0.679263
Amygdala	GO:0003334~keratinocyte development	3	0.508475	0.0518553	0.679263
Amygdala	GO:0031065~positive regulation of histone deacetylation	3	0.508475	0.0518553	0.679263
Amygdala	GO:0048699~generation of neurons	3	0.508475	0.0518553	0.679263
Amygdala	GO:0071397~cellular response to cholesterol	3	0.508475	0.0518553	0.679263
Amygdala	GO:0051602~response to electrical stimulus	4	0.677966	0.0535787	0.688497
Amygdala	GO:0050775~positive regulation of dendrite morphogenesis	4	0.677966	0.0535787	0.688497
Amygdala	GO:0042149~cellular response to glucose starvation	4	0.677966	0.0535787	0.688497
Amygdala	GO:0097694~establishment of RNA localization to telomere	2	0.338983	0.0564754	0.705142
Amygdala	GO:0060401~cytosolic calcium ion transport	2	0.338983	0.0564754	0.705142
Amygdala	GO:0035261~external genitalia morphogenesis	2	0.338983	0.0564754	0.705142
Amygdala	GO:1904908~negative regulation of maintenance of mitotic sister chromatid cohesion, telomeric	2	0.338983	0.0564754	0.705142
Amygdala	GO:0048638~regulation of developmental growth	2	0.338983	0.0564754	0.705142
Amygdala	GO:1904884~positive regulation of telomerase catalytic core complex assembly	2	0.338983	0.0564754	0.705142
Amygdala	GO:0048875~chemical homeostasis within a tissue	2	0.338983	0.0564754	0.705142
Amygdala	GO:0006986~response to unfolded protein	5	0.847458	0.0578757	0.711299
Amygdala	GO:0050767~regulation of neurogenesis	4	0.677966	0.0581035	0.709869
Amygdala	GO:0042771~intrinsic apoptotic signaling pathway in response to DNA damage by p53 class mediator	4	0.677966	0.0581035	0.709869
Amygdala	GO:0044255~cellular lipid metabolic process	3	0.508475	0.0593775	0.715027
Amygdala	GO:0050884~neuromuscular process controlling posture	3	0.508475	0.0593775	0.715027
Amygdala	GO:0035235~ionotropic glutamate receptor signaling pathway	3	0.508475	0.0593775	0.715027
Amygdala	GO:0033138~positive regulation of peptidyl-serine phosphorylation	6	1.01695	0.0609667	0.721929
Amygdala	GO:0001942~hair follicle development	5	0.847458	0.0613425	0.721395
Amygdala	GO:0006915~apoptotic process	24	4.0678	0.0615672	0.719968
Amygdala	GO:0032212~positive regulation of telomere maintenance via telomerase	4	0.677966	0.0628023	0.724519
Amygdala	GO:0031643~positive regulation of myelination	3	0.508475	0.0672471	0.746697
Amygdala	GO:0061029~eyelid development in camera-type eye	3	0.508475	0.0672471	0.746697
Amygdala	GO:0035136~forelimb morphogenesis	3	0.508475	0.0672471	0.746697
Amygdala	GO:0000188~inactivation of MAPK activity	3	0.508475	0.0672471	0.746697
Amygdala	GO:0046326~positive regulation of glucose import	4	0.677966	0.0676714	0.746318
Amygdala	GO:0030335~positive regulation of cell migration	11	1.86441	0.0678214	0.744488
Amygdala	GO:0043406~positive regulation of MAP kinase activity	5	0.847458	0.0685973	0.745985
Amygdala	GO:0030334~regulation of cell migration	6	1.01695	0.0698717	0.750031
Amygdala	GO:0045892~negative regulation of transcription, DNA-templated	24	4.0678	0.0699995	0.748128
Amygdala	GO:0019228~neuronal action potential	4	0.677966	0.0727068	0.759192
Amygdala	GO:0007160~cell-matrix adhesion	6	1.01695	0.0729911	0.758088
Amygdala	GO:0006281~DNA repair	15	2.54237	0.0748793	0.764695
Amygdala	GO:0032230~positive regulation of synaptic transmission, GABAergic	3	0.508475	0.0754379	0.764887
Amygdala	GO:0035418~protein localization to synapse	3	0.508475	0.0754379	0.764887
Amygdala	GO:0045666~positive regulation of neuron differentiation	7	1.18644	0.0755467	0.762972
Amygdala	GO:0060348~bone development	5	0.847458	0.0762736	0.76396
Amygdala	GO:1901215~negative regulation of neuron death	5	0.847458	0.0762736	0.76396
Amygdala	GO:0034504~protein localization to nucleus	4	0.677966	0.0779041	0.769056
Amygdala	GO:0002027~regulation of heart rate	4	0.677966	0.0832592	0.789847
Amygdala	GO:0071596~ubiquitin-dependent protein catabolic process via the N-end rule pathway	2	0.338983	0.0835078	0.788598
Amygdala	GO:0060379~cardiac muscle cell myoblast differentiation	2	0.338983	0.0835078	0.788598
Amygdala	GO:0097676~histone H3-K36 dimethylation	2	0.338983	0.0835078	0.788598
Amygdala	GO:0014829~vascular smooth muscle contraction	2	0.338983	0.0835078	0.788598
Amygdala	GO:0051481~negative regulation of cytosolic calcium ion concentration	3	0.508475	0.0839253	0.788052
Amygdala	GO:0035024~negative regulation of Rho protein signal transduction	3	0.508475	0.0839253	0.788052
Amygdala	GO:0050885~neuromuscular process controlling balance	5	0.847458	0.0843619	0.787591
Amygdala	GO:0006810~transport	63	10.678	0.0874405	0.797613
Amygdala	GO:0071549~cellular response to dexamethasone stimulus	4	0.677966	0.0887675	0.80053
Amygdala	GO:0002053~positive regulation of mesenchymal cell proliferation	4	0.677966	0.0887675	0.80053
Amygdala	GO:0021954~central nervous system neuron development	3	0.508475	0.0926855	0.812799
Amygdala	GO:1900273~positive regulation of long-term synaptic potentiation	3	0.508475	0.0926855	0.812799
Amygdala	GO:0048856~anatomical structure development	3	0.508475	0.0926855	0.812799
Amygdala	GO:0007094~mitotic spindle assembly checkpoint	3	0.508475	0.0926855	0.812799
Amygdala	GO:0001736~establishment of planar polarity	3	0.508475	0.0926855	0.812799
Amygdala	GO:0050966~detection of mechanical stimulus involved in sensory perception of pain	3	0.508475	0.0926855	0.812799
Amygdala	GO:0016311~dephosphorylation	7	1.18644	0.0931667	0.812421
Amygdala	GO:0016197~endosomal transport	4	0.677966	0.0944243	0.814766
Amygdala	GO:0000723~telomere maintenance	4	0.677966	0.0944243	0.814766
Amygdala	GO:0050890~cognition	4	0.677966	0.0944243	0.814766
Tissue	Term	Count	%	PValue	Benjamini
Blood	GO:0007156~homophilic cell adhesion via plasma membrane adhesion molecules	38	9.92167	9.92e-30	1.63e-26
Blood	GO:0002376~immune system process	22	5.74413	1.13e-05	0.00922594
Blood	GO:0010886~positive regulation of cholesterol storage	4	1.04439	0.000212	0.110027
Blood	GO:0006898~receptor-mediated endocytosis	7	1.82768	0.00086	0.298293
Blood	GO:0042102~positive regulation of T cell proliferation	7	1.82768	0.00121096	0.328935
Blood	GO:0048246~macrophage chemotaxis	4	1.04439	0.00200491	0.423377
Blood	GO:0035235~ionotropic glutamate receptor signaling pathway	4	1.04439	0.00200491	0.423377
Blood	GO:0006954~inflammatory response	16	4.17755	0.00209708	0.389594
Blood	GO:0045087~innate immune response	17	4.43864	0.00343974	0.507838
Blood	GO:0030073~insulin secretion	5	1.30548	0.00393418	0.513703
Blood	GO:0001774~microglial cell activation	4	1.04439	0.00425327	0.5042
Blood	GO:0048662~negative regulation of smooth muscle cell proliferation	5	1.30548	0.0053093	0.549132
Blood	GO:0031623~receptor internalization	5	1.30548	0.00638516	0.584652
Blood	GO:0010807~regulation of synaptic vesicle priming	3	0.78329	0.00683616	0.580434
Blood	GO:0007411~axon guidance	9	2.34987	0.00689526	0.556693
Blood	GO:0006897~endocytosis	10	2.61097	0.00698892	0.536807
Blood	GO:0034383~low-density lipoprotein particle clearance	3	0.78329	0.00900315	0.605602
Blood	GO:0001878~response to yeast	3	0.78329	0.00900315	0.605602
Blood	GO:0043524~negative regulation of neuron apoptotic process	9	2.34987	0.0103812	0.635926
Blood	GO:0017157~regulation of exocytosis	4	1.04439	0.0108906	0.632615
Blood	GO:0032689~negative regulation of interferon-gamma production	4	1.04439	0.0134767	0.691319
Blood	GO:0021549~cerebellum development	5	1.30548	0.0139227	0.684594
Blood	GO:0007269~neurotransmitter secretion	4	1.04439	0.0148894	0.691435
Blood	GO:0010976~positive regulation of neuron projection development	8	2.08877	0.0149302	0.675502
Blood	GO:0007268~chemical synaptic transmission	9	2.34987	0.0155132	0.673363
Blood	GO:0010744~positive regulation of macrophage derived foam cell differentiation	3	0.78329	0.0170443	0.692424
Blood	GO:0019221~cytokine-mediated signaling pathway	8	2.08877	0.0197334	0.730783
Blood	GO:0030198~extracellular matrix organization	7	1.82768	0.0199614	0.720986
Blood	GO:0071294~cellular response to zinc ion	3	0.78329	0.0202041	0.711861
Blood	GO:0010038~response to metal ion	3	0.78329	0.0202041	0.711861
Blood	GO:0050885~neuromuscular process controlling balance	5	1.30548	0.0228621	0.743228
Blood	GO:0006779~porphyrin-containing compound biosynthetic process	3	0.78329	0.0235871	0.742005
Blood	GO:0070374~positive regulation of ERK1 and ERK2 cascade	9	2.34987	0.0249342	0.749777
Blood	GO:0007616~long-term memory	4	1.04439	0.0250674	0.740231
Blood	GO:0061025~membrane fusion	4	1.04439	0.0270486	0.755973
Blood	GO:0030705~cytoskeleton-dependent intracellular transport	3	0.78329	0.0271842	0.74708
Blood	GO:0003407~neural retina development	3	0.78329	0.0271842	0.74708
Blood	GO:0031629~synaptic vesicle fusion to presynaptic active zone membrane	3	0.78329	0.0271842	0.74708
Blood	GO:0050729~positive regulation of inflammatory response	5	1.30548	0.0298812	0.769765
Blood	GO:0050830~defense response to Gram-positive bacterium	6	1.56658	0.0299878	0.761137
Blood	GO:0007263~nitric oxide mediated signal transduction	3	0.78329	0.0309861	0.762874
Blood	GO:0006878~cellular copper ion homeostasis	3	0.78329	0.0309861	0.762874
Blood	GO:0050808~synapse organization	4	1.04439	0.0312543	0.756488
Blood	GO:0032496~response to lipopolysaccharide	9	2.34987	0.0315349	0.750416
Blood	GO:0014912~negative regulation of smooth muscle cell migration	3	0.78329	0.034984	0.777527
Blood	GO:2000521~negative regulation of immunological synapse formation	2	0.522193	0.0369283	0.787405
Blood	GO:0034381~plasma lipoprotein particle clearance	2	0.522193	0.0369283	0.787405
Blood	GO:0071874~cellular response to norepinephrine stimulus	2	0.522193	0.0369283	0.787405
Blood	GO:2001189~negative regulation of T cell activation via T cell receptor contact with antigen bound to MHC molecule on antigen presenting cell	2	0.522193	0.0369283	0.787405
Blood	GO:0032092~positive regulation of protein binding	5	1.30548	0.038042	0.789244
Blood	GO:0002548~monocyte chemotaxis	4	1.04439	0.0381657	0.782384
Blood	GO:0007155~cell adhesion	16	4.17755	0.0384208	0.776805
Blood	GO:0048488~synaptic vesicle endocytosis	3	0.78329	0.0391694	0.775698
Blood	GO:0010867~positive regulation of triglyceride biosynthetic process	3	0.78329	0.0391694	0.775698
Blood	GO:0072657~protein localization to membrane	3	0.78329	0.0391694	0.775698
Blood	GO:0043433~negative regulation of sequence-specific DNA binding transcription factor activity	5	1.30548	0.0398126	0.773733
Blood	GO:0008344~adult locomotory behavior	5	1.30548	0.0398126	0.773733
Blood	GO:0007017~microtubule-based process	4	1.04439	0.0406282	0.773303
Blood	GO:0043087~regulation of GTPase activity	5	1.30548	0.0434926	0.789292
Blood	GO:0006882~cellular zinc ion homeostasis	3	0.78329	0.0435339	0.782666
Blood	GO:0050860~negative regulation of T cell receptor signaling pathway	3	0.78329	0.0435339	0.782666
Blood	GO:0048013~ephrin receptor signaling pathway	4	1.04439	0.0457877	0.792872
Blood	GO:0006887~exocytosis	6	1.56658	0.0466842	0.792759
Blood	GO:0016192~vesicle-mediated transport	9	2.34987	0.0467019	0.786392
Blood	GO:0021766~hippocampus development	5	1.30548	0.0473575	0.784696
Blood	GO:0051443~positive regulation of ubiquitin-protein transferase activity	3	0.78329	0.0480695	0.783453
Blood	GO:0006836~neurotransmitter transport	4	1.04439	0.0512546	0.798865
Blood	GO:0051384~response to glucocorticoid	5	1.30548	0.0514067	0.793905
Blood	GO:0030301~cholesterol transport	3	0.78329	0.0527682	0.796772
Blood	GO:0007166~cell surface receptor signaling pathway	9	2.34987	0.0534307	0.795191
Blood	GO:2000660~negative regulation of interleukin-1-mediated signaling pathway	2	0.522193	0.0548794	0.798468
Blood	GO:0071356~cellular response to tumor necrosis factor	6	1.56658	0.0549891	0.793591
Blood	GO:0031668~cellular response to extracellular stimulus	3	0.78329	0.062625	0.830375
Blood	GO:0010243~response to organonitrogen compound	3	0.78329	0.0677684	0.849463
Blood	GO:0007611~learning or memory	4	1.04439	0.0694292	0.851971
Blood	GO:0006935~chemotaxis	6	1.56658	0.0699393	0.849584
Blood	GO:0034154~toll-like receptor 7 signaling pathway	2	0.522193	0.0724968	0.855658
Blood	GO:0010273~detoxification of copper ion	2	0.522193	0.0724968	0.855658
Blood	GO:0019732~antifungal humoral response	2	0.522193	0.0724968	0.855658
Blood	GO:0032497~detection of lipopolysaccharide	2	0.522193	0.0724968	0.855658
Blood	GO:0007412~axon target recognition	2	0.522193	0.0724968	0.855658
Blood	GO:0032755~positive regulation of interleukin-6 production	4	1.04439	0.0727064	0.852144
Blood	GO:1900087~positive regulation of G1/S transition of mitotic cell cycle	3	0.78329	0.073046	0.849183
Blood	GO:0045766~positive regulation of angiogenesis	6	1.56658	0.076069	0.856827
Blood	GO:0030097~hemopoiesis	5	1.30548	0.0769153	0.855907
Blood	GO:0070098~chemokine-mediated signaling pathway	4	1.04439	0.082941	0.873239
Blood	GO:0050772~positive regulation of axonogenesis	3	0.78329	0.0839763	0.872866
Blood	GO:0043278~response to morphine	3	0.78329	0.0839763	0.872866
Blood	GO:0008203~cholesterol metabolic process	5	1.30548	0.0847944	0.871801
Blood	GO:0001578~microtubule bundle formation	3	0.78329	0.0896163	0.883097
Blood	GO:0050806~positive regulation of synaptic transmission	3	0.78329	0.0896163	0.883097
Blood	GO:0019915~lipid storage	3	0.78329	0.0896163	0.883097
Blood	GO:1900086~positive regulation of peptidyl-tyrosine autophosphorylation	2	0.522193	0.0897868	0.880116
Blood	GO:0019896~axonal transport of mitochondrion	2	0.522193	0.0897868	0.880116
Blood	GO:0070885~negative regulation of calcineurin-NFAT signaling cascade	2	0.522193	0.0897868	0.880116
Blood	GO:0072102~glomerulus morphogenesis	2	0.522193	0.0897868	0.880116
Blood	GO:0001504~neurotransmitter uptake	2	0.522193	0.0897868	0.880116
Blood	GO:0007044~cell-substrate junction assembly	2	0.522193	0.0897868	0.880116
Blood	GO:0015992~proton transport	4	1.04439	0.0937548	0.888055
Blood	GO:0007399~nervous system development	12	3.13316	0.0962078	0.891394
NOTE: Functional annotation tool for Gene Ontology Enrichment Analysis (Goterm BP Direct)
